# Supplementary material for: Hematopoietic Stem Cell (HSC)-Independent Progenitors Are Susceptible to Mll-Af9-Induced Leukemic Transformation
Source: MDPI journal article supplement (doi:10.3390/cancers15143624), 2023-07-14
Supplement: s1 [file s1]

## Supplementary Figures and Legends

A

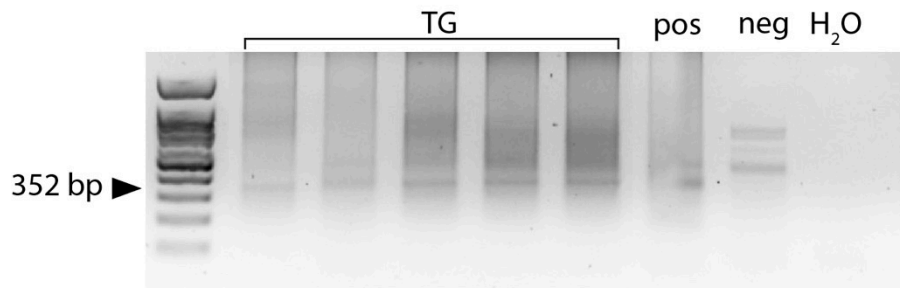

B

*Tie2-Cre::Mll<sup>loxP</sup>::Af9<sup>loxP</sup>* transplants

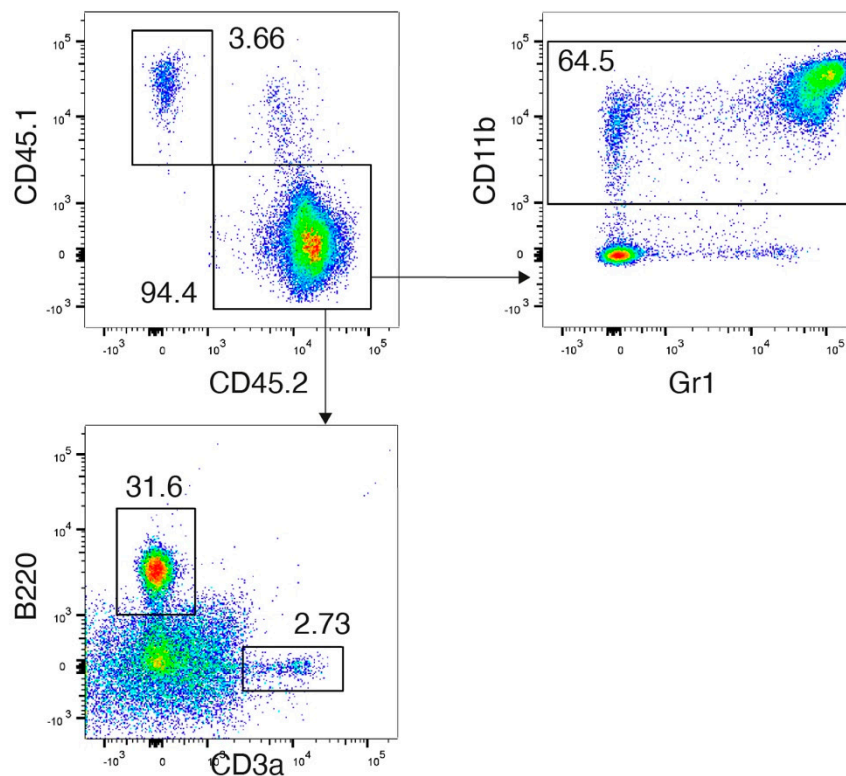

**Figure S1. Additional analysis of *Tie2-Cre::Mll<sup>loxP</sup>::Af9<sup>loxP</sup>* mice and transplants.**

(A) Agarose gel showing the presence of the expected size amplicon (black arrow head) corresponding to the Mll-Af9 translocation in the bone marrow (BM) of *Tie2-Cre::Mll<sup>loxP</sup>::Af9<sup>loxP</sup>* mice (TG). Positive (pos) and negative (neg) controls are shown.

(B) Representative flow cytometric peripheral blood (PB) analysis of lethally irradiated mice transplanted with BM cells derived from *Tie2-Cre::Mll<sup>loxP</sup>::Af9<sup>loxP</sup>* adult mice. Donor-derived chimerism (CD45.1 vs CD45.2, top left), myeloid cells (CD11b vs Gr1, top right), B and T lymphocytes (B220 vs CD3a, bottom) were assessed.

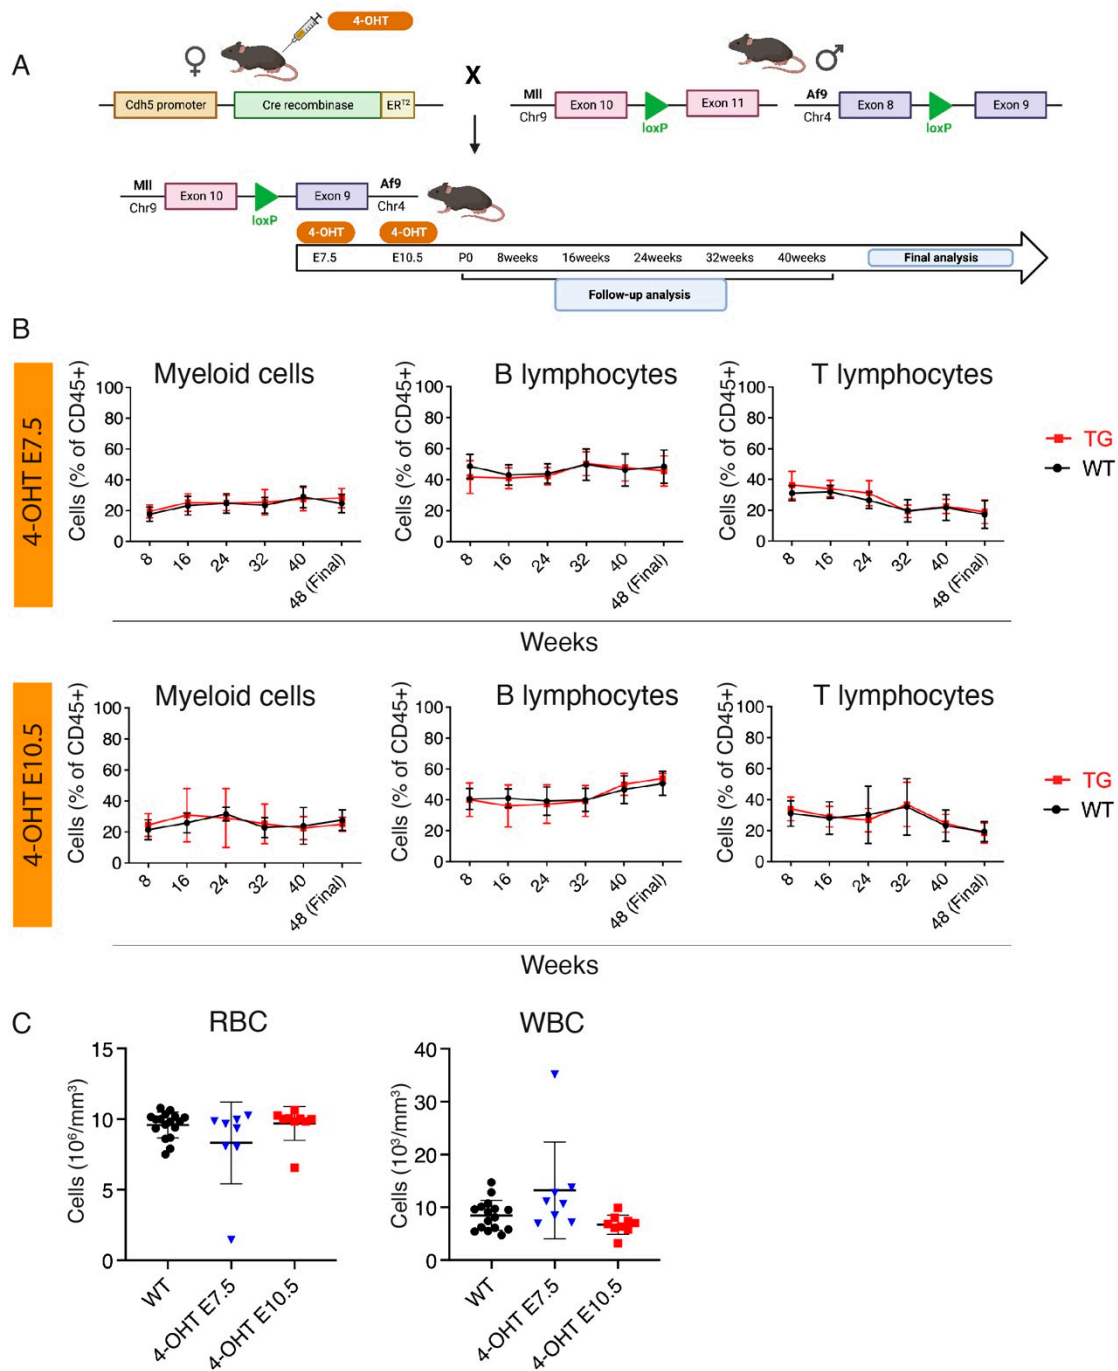

**Figure S2. Analysis of unperturbed adult *Cdh5-CreER<sup>T2</sup>::Mll<sup>loxP</sup>::Af9<sup>loxP</sup>* mice.**

**(A)** Schematic of crossing strategy, Cre activation (4-OHT at E7.5 or E10.5) and analyses of adult *Cdh5-CreER<sup>T2</sup>::Mll<sup>loxP</sup>::Af9<sup>loxP</sup>* mice.

**(B)** Quantification of flow cytometric analysis of myeloid (left), B (middle) and T lymphocytes (right) in WT (black) and *Cdh5-CreER<sup>T2</sup>::Mll<sup>loxP</sup>::Af9<sup>loxP</sup>* (TG, red) unperturbed adult mice PB, with the administration of 4-OHT at E7.5 (top) or E10.5 (bottom). Data are mean  $\pm$  SD.

**(C)** Red blood cells (RBC, left) and white blood cells (WBC, right) absolute counts of 48 weeks-old WT (black) and *Cdh5-CreER<sup>T2</sup>::Mll<sup>loxP</sup>::Af9<sup>loxP</sup>* adult mice with the administration of 4-OHT at E7.5 (blue) or E10.5 (red). Data are mean  $\pm$  SD.

A

|               | FL               |       | BM primary tx    |       | BM secondary tx  |       | Fraction of Mll-Af9 pos mice |
|---------------|------------------|-------|------------------|-------|------------------|-------|------------------------------|
|               | Mll-Af9 positive | Total | Mll-Af9 positive | Total | Mll-Af9 positive | Total |                              |
| Tx 4-OHT E7.5 | 6                | 6     | 6                | 6     | 5                | 8     | 17/20 (85%)                  |
| Tx Tam E10.5  | 4                | 8     | 2                | 8     | 4                | 5     | 10/21 (47.6%)                |

B

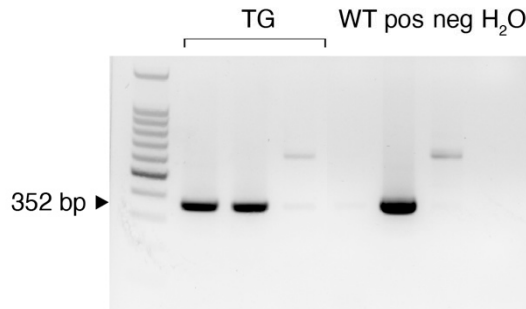

**Figure S3. Detection of Mll-Af9 translocation in *Cdh5-CreER<sup>T2</sup>::Mll<sup>loxP</sup>::Af9<sup>loxP</sup>* transplants.**

(A) Table representing the number of samples, per condition and total, used for primary and secondary transplantation analysis of *Cdh5-CreER<sup>T2</sup>::Mll<sup>loxP</sup>::Af9<sup>loxP</sup>* (4-OHT at E7.5 or Tamoxifen at E10.5) FL and BM. This table summarizes the number of samples in which the Mll-Af9 translocation was detected by PCR. The “BM primary tx” and “BM secondary tx” columns refer to the analysis done on the BM of transplant recipients.

(B) Representative agarose gel showing the presence of the expected 352-bp amplicon corresponding to the Mll-Af9 inter-chromosomal translocation in 2/3 *Cdh5-CreER<sup>T2</sup>::Mll<sup>loxP</sup>::Af9<sup>loxP</sup>* transgenic (TG) FL samples (Tamoxifen at E10.5). Positive control (pos), wild type (WT) and negative (neg) controls are shown.

| <b>Primer name</b>   | <b>Sequence (5'-3')</b>         | <b>Cre/CRISPR</b> |
|----------------------|---------------------------------|-------------------|
| 1A_Mll-intron_FW     | GTC CCC ATA ACA CCC AGA GTA GTG | Cre               |
| 1B_AF9-intron_Rev    | CCT CAT TCT GAC AGA CCA GAG CCA | Cre               |
| 2A_Mll-intron_FW     | GGG CAT GTA GAG GTA AGA CGC CTG | Cre               |
| 2B_AF9-intron_Rev    | ATC TCC AGG GAC TGA ATC TAG GGC | Cre               |
| Mll_int10-CRISPR_FW  | AAA CCA ACA GCA ACC CTT TTT     | CRISPR            |
| Mll_int10-CRISPR_Rev | GCA GTG GGC ATG TAG AGG TAA     | CRISPR            |
| AF9_int8-CRISPR_FW   | TTT GTT CCC ATC ACA TCT GCC     | CRISPR            |
| AF9_int8-CRISPR_Rev  | GGC AGC CAC TCA GTA ACT TG      | CRISPR            |

**Table S1. Primer sequences used for Mll-Af9 detection by PCR.**

The third column indicates if primers were used to detect Cre/LoxP-induced or CRISPR/Cas9-induced translocation.
